1 **Title:** Monovalent XBB.1.5 COVID-19 vaccine effectiveness against hospitalisations and deaths  
2 during the Omicron BA.2.86/JN.1 period among older adults in seven European countries: A  
3 VEBIS-EHR Network Study

4 **Authors:** Baltazar Nunes<sup>1\*</sup>, James Humphreys<sup>1</sup>, Nathalie Nicolay<sup>2</sup>, Toon Braeye<sup>3</sup>, Izaak Van  
5 Evercooren<sup>3</sup>, Christian Holm Hansen<sup>4</sup>, Ida Rask Moustsen-Helms<sup>4</sup>, Chiara Sacco<sup>5,6</sup>, Massimo  
6 Fabiani<sup>5</sup>, Jesús Castilla<sup>7,8</sup>, Iván Martínez-Baz<sup>7,8</sup>, Hinta Meijerink<sup>9</sup>, Ausenda Machado<sup>10</sup>, Patricia  
7 Soares<sup>10</sup>, Rickard Ljung<sup>11</sup>, Nicklas Pihlström<sup>11</sup>, Anthony Nardone<sup>1</sup>, Sabrina Bacci<sup>2</sup>, Susana  
8 Monge<sup>12,13</sup>, VEBIS-EHR working group

9 \* Corresponding author

#### 10 **Affiliations**

11 <sup>1</sup> Epiconcept, Paris, France

12 <sup>2</sup> Vaccine Preventable Diseases and Immunisation, European Centre for Disease Prevention and  
13 Control (ECDC), Solna, Sweden

14 <sup>3</sup> Sciensano, Juliette Wytsmanstraat 14. 1050 Elsene, Belgium

15 <sup>4</sup> Department of Infectious Disease Epidemiology and Prevention, Statens Serum Institut,  
16 Copenhagen, Denmark

17 <sup>5</sup> Infectious Diseases Department, Istituto Superiore di Sanità, Rome, Italy

18 <sup>6</sup> European Programme on Intervention Epidemiology Training (EPIET), European Centre for  
19 Disease Prevention and Control, Stockholm, Sweden

20 <sup>7</sup> Instituto de Salud Pública de Navarra – IdiSNA, Pamplona, Spain

21 <sup>8</sup> CIBER on Epidemiology and Public Health, Spain

22 <sup>9</sup> Norwegian Institute of Public Health (NIPH), Oslo, Norway

23 <sup>10</sup> Instituto Nacional de Saúde Doutor Ricardo Jorge, Lisboa, 1600-609, Portugal

24 <sup>11</sup> Swedish Medical Products Agency, Uppsala, Sweden

25 <sup>12</sup> Department of Communicable Diseases, National Centre of Epidemiology, Institute of Health

26 Carlos III, Madrid, Spain.

27 <sup>13</sup> CIBER on Infectious Diseases, Spain

28

29

30 **VEBIS-EHR working group:** Esther Kissling<sup>1</sup>, Mario Fontán-Vela<sup>12</sup>, Joris Van Loenhout<sup>3</sup>, Pierre

31 Hubin<sup>3</sup>, Alberto Mateo-Urdiales<sup>5</sup>, Daniele Petrone<sup>5</sup>, Patrizio Pezzotti<sup>5</sup>, Itziar Casado<sup>7,8</sup>, Aitziber

32 Echeverria<sup>7,8</sup>, Camino Trobajo-Sanmartín<sup>7,8</sup>, Diana Lucas<sup>10</sup>.

33

34 **Corresponding author:**

35 Dr. Baltazar Nunes

36 Epiconcept, Paris, France

37 b.nunes@epiconcept.ft

38

39 **Word count:** 2,610

40 **Abstract word count:** 254

41 **Abstract**

42 Background

43 Monovalent XBB.1.5 vaccine was administered among those aged  $\geq 65$  years in EU/EEA countries  
44 in autumn 2023; soon after SARS-Cov-2 BA.2.86/JN.1 lineages became dominant. We aimed to  
45 estimate XBB.1.5 vaccine effectiveness (VE) against COVID-19-related hospitalisations and  
46 deaths during a period of BA.2.86/JN.1 predominance using a European multi-country study.

47 Methods

48 We linked electronic health record data to create historical cohorts in Belgium, Denmark, Italy,  
49 Navarre (Spain), Norway, Portugal and Sweden. We included individuals aged  $\geq 65$  years eligible  
50 for the autumnal 2023 COVID-19 vaccine with at least a primary series. Follow-up started when  
51  $\geq 80\%$  of country-specific sequenced viruses were BA.2.86/JN.1 lineages (4/12/23 to 08/01/24)  
52 and ended 25/02/2024. At study site level, we estimated the overall vaccine confounder-  
53 adjusted (for age, sex, country's region, comorbidities and previous booster doses) hazard ratio  
54 (aHR) of COVID-19 hospitalisations and deaths between individuals with  $\geq 14$  days after  
55 vaccination and individuals unvaccinated in autumn 2023, as well as by time since vaccination  
56 and stratified by age groups. VE was estimated as  $(1 - \text{pooled aHR}) \times 100$  with a random effects  
57 model.

58 Results

59 XBB.1.5 VE against COVID-19 hospitalisations was 50% (95%CI: 45 to 55) and 41% (95%CI: 35 to  
60 46) in 65-79-year-olds and in  $\geq 80$ -year-olds respectively. VE against COVID-19-related-death was  
61 58% (95%CI: 42 to 69) and 48% (95%CI: 38 to 57), respectively, in both age groups. VE estimates  
62 against each respective outcome declined in all age group over time.

63 Conclusion

64 Monovalent XBB.1.5 vaccine had a moderate protective effect against severe COVID-19 likely  
65 caused by BA.2.86/JN.1 during the 2023/2024 winter, among persons aged  $\geq 65$ .

66 **Keywords:** COVID-19, SARS-CoV-2, vaccine effectiveness, hospitalisation, cohort design,  
67 electronic health records, multi-country study.

## 68 Introduction

69 In autumn 2023, COVID-19 vaccination campaigns were carried out in EU/EEA countries aiming  
70 to reduce the risk of severe disease among the most vulnerable populations. The target groups  
71 generally included those aged  $\geq 60$  or  $\geq 65$  years, persons living with comorbidities or conditions  
72 that could increase the risk of severe disease, health professionals, and caregivers. The  
73 monovalent Omicron XBB.1.5 vaccine was used in most EU/EEA countries and delivered as a  
74 booster dose or primary vaccination during autumn/winter 2023/24. In January 2024 (1) the  
75 median vaccine coverage among EU/EEA countries was 12% (range 0.01%–66.1%) and 17.1  
76 (range 0.01%–89.3%), for those aged  $\geq 60$  or  $\geq 80$  years respectively - a range which indicates  
77 variability between countries in terms of vaccine uptake. Eighty-two percent of the vaccines  
78 administered during the autumn/winter 2023/24 campaign were Comirnaty Omicron XBB.1.5  
79 (Pfizer BioNTech) vaccine (1).

80 In early autumn 2023, in EU/EEA countries, the XBB.1.5 lineage was predominant. The BA.2.86  
81 and JN.1 SARS-CoV-2 lineages rapidly increased, gaining dominance in all EU/EEA countries by  
82 mid-December (2).

83 Several studies reported XBB.1.5 vaccine effectiveness (VE) against severe disease in the first  
84 months of the autumn/winter season at a time of XBB.1.5 predominance (3–6), including one  
85 study conducted within the Vaccine Effectiveness Burden and Impact Studies project EHR  
86 network (VEBIS-EHR) (4). These studies reported VE against COVID-19 hospitalisations ranging  
87 between 62% to 74%, 52% to 74%, and 52% to 66% among those aged  $\geq 18$ ,  $\geq 65$  and  $\geq 80$  years  
88 old respectively.

89 The BA.2.86 SARS-CoV-2 lineage presents more than 30 amino acid mutations compared to the  
90 XBB.1.5 lineage, and JN.1, a descendant of BA.2.86, harbours the L455S substitution at the  
91 receptor binding site. These mutations could provide immune escape capacities and reduce the  
92 effectiveness of the XBB.1.5 vaccine (7). However, studies of XBB.1.5 VE against severe disease

93 during periods of BA.2.86 or JN.1 predominance are still scarce (5,8). In this context, we aimed  
94 to estimate XBB.1.5 VE against COVID-19-related hospitalisations and deaths overall and by time  
95 since vaccination during a period of BA.2.86/JN.1 predominance within a European multi-  
96 country study among older adults aged 65-79 and  $\geq 80$  years old.

## 97 **Methods**

98 This study was developed under the VEBIS-EHR network. The VEBIS project, funded by the  
99 European Centre for Prevention and Disease Control (ECDC), aims to monitor COVID-19 VE using  
100 linkage of electronic health records (EHR) within an EU/EEA multi-country setting. As of April  
101 2024, seven countries participate in the VEBIS-EHR network: Belgium, Denmark, Italy, Spain  
102 (Navarre), Norway, Portugal, and Sweden.

103 Detailed methods and the results of VEBIS-EHR studies have been published previously (9–11).  
104 Briefly, using a common protocol (12) we developed a historical cohort study by reconstructing  
105 study site cohorts of individuals aged 65 years or older resident in the and eligible to receive the  
106 autumnal 2023 vaccine dose at the start of the country-specific vaccination campaign  
107 (Supplementary material, Table S1, Annex 1), i.e., those aged 65 years or older, with primary  
108 vaccination series completed at least 180 days ago and who, in the last 90 days, had no vaccine  
109 dose administered nor documented SARS-CoV-2 infection or COVID-19 hospitalisation. Detailed  
110 information on the eligibility criteria is presented in the Supplementary material, Annex 2.  
111 Vaccination status, baseline characteristics, and outcome occurrence were obtained by linking  
112 national/regional EHR. We defined BA.2.86/JN.1 lineage predominance period at the study-site  
113 level, designating the period of predominance to have started by the date on which 80% of  
114 sequenced samples were attributable to BA.2.86/JN.1 based on data extracted from the ECDC  
115 European Respiratory Virus Surveillance Summary (ERVISS)(13) database and subset to the  
116 countries of interest.

117 If the number of the weekly sequenced viruses was low, BA.2.86 frequency data from  
118 neighbouring countries were used as a proxy (Supplementary material, Annex 1). In Table S1 we  
119 present details on the start of BA.2.86 predominance period by study site. The end of the study  
120 period was 25 February in all study sites, approximately two months before data extraction  
121 (April 2024) to ensure EHR were sufficiently updated.

122 Among those identified as eligible at the start of the vaccination campaign (Supplementary  
123 material, Annex 2), we excluded all individuals hospitalised due to COVID-19 between the start  
124 of the vaccination campaign and the country-specific starting date of the study. Individual  
125 follow-up started at the beginning of the country-specific study period and ceased at the date  
126 of either the outcome, death for any cause, or the end of the study period - whichever was  
127 earliest. Vaccination status was treated as a time-dependent exposure, excluding the time-  
128 interval 1-14 days post-vaccination from the analysis.

129 Hospitalisation due to COVID-19 was defined as a hospital admission due to a severe acute  
130 respiratory infection with a SARS-CoV-2 positive test from 14 days before to one day after  
131 admission, or with COVID-19 as the primary diagnosis in admission on discharge records. A  
132 COVID-19-related death was defined as a death with COVID-19 coded as cause, or death for any  
133 cause with a SARS-CoV-2 positive test in the 30 days preceding death.

134 We undertook a two-stage pooling of estimates calculated at the study-site level. In the first  
135 stage, site-specific estimates of confounder-adjusted vaccine hazard ratios (aHR) and 95%  
136 confidence intervals (95%CI) were calculated using Cox regression with calendar time as the  
137 underlying scale adjusted by 5-year age groups, sex, region in the country, comorbidities,  
138 number of vaccine booster doses received prior to the current vaccination campaign, and  
139 nationality and socioeconomic status in some of the study sites (Supplementary material, Annex  
140 3 and 4). In the second stage, study site-specific aHR estimates and standard errors were pooled  
141 using a random-effects meta-analysis using Paule-Mantel method. Pooled VE was estimated as

142 (1-pooled aHR)x100. To assess heterogeneity, we used the I<sup>2</sup> index (14). A fixed-effects model  
143 was used as a secondary analysis.

## 144 **Results**

145 At the end of the individual observation period, we included 13,907,924 and 6,533,724 persons  
146 across both age groups, in the unvaccinated and vaccinated cohorts, respectively. Among the  
147 vaccinated cohorts, at the end of the observation period, 2,604,152 (39.9%) and 3,929,572  
148 (60.1%) belonged, respectively, to those who were vaccinated 14 to 89 days and 90 to 179 days.

149 The proportion of individuals with high-risk comorbidities (7.3% vs 2.6%) and with a greater  
150 number of previous booster doses ( $\geq 2$  boosters: 92.3% vs 33.1%) was higher among vaccinated  
151 than unvaccinated. Further, but to a lesser extent, vaccinated persons with a longer time since  
152 vaccination (90-179 days) also had a greater frequency of high-risk comorbidities (9.0% vs 4.8%)  
153 and a greater number of previous boosters ( $\geq 2$  boosters: 94.3% vs 89.4%) doses compared to  
154 those vaccinated with less time since vaccination (14-90 days) (Table 1).

155 In the 65-79 years age group there were 1,765 hospitalisation events among 17.8 million person-  
156 months at risk in unvaccinated, and 908 COVID-19 hospitalisations events among 9.9 million  
157 person-months at risk in vaccinated persons. XBB.1.5 COVID-19 VE against COVID-19  
158 hospitalisations was 50% (95%CI: 45 to 55) overall, 51% (95%CI: 45 to 56) and 47% (95%CI: 32 to  
159 59) among those who received the vaccine respectively between 14 to 89 days and 90 to 179  
160 days.

161 In  $\geq 80$  years age-group, there were 2,130 COVID-19 hospitalisation events among 7.0 million  
162 person-months at risk in unvaccinated, and 1,306 among 4.1 million person-months at risk in  
163 vaccinated persons. VE was 41% (95%CI: 35 to 46) overall and 42% (95%CI: 36 to 47) and 38%  
164 (95%CI: 17 to 54%) by time since vaccination among those who received the vaccine between  
165 14 to 89 days and 90 to 179 days, respectively.



166 In the 65–79-year age-group there were 256 COVID-19 related deaths among 15.9 million  
167 person-months at risk in unvaccinated, and 151 among 7.8 million person-months at risk in  
168 vaccinated individuals. XBB.1.5 COVID-19 VE estimates against COVID-19-related deaths, was  
169 58% (95%CI: 42 to 69) overall, 59% (95%CI: 41 to 72) and 54% (95%CI: -17 to 82) respectively  
170 among those who received the vaccine between 14 to 89 days and 90 to 179 days.

171 In the  $\geq 80$ -year age-group, there were 570 COVID-19 related deaths event among 6.6 million  
172 person-months at risk in unvaccinated, and 389 among 3.4 million person-months at risk in  
173 unvaccinated persons. The XBB.1.5 COVID-19 was 48% (95%CI: 38 to 57) overall, 51% (95%CI: 42  
174 to 59) and 9% (95%CI: -86 to 56%) among those who received the vaccine between 14 to 89 days  
175 and 90 to 179 days, respectively (Table 2).

176 There was low to moderate heterogeneity between study sites' aHR estimates among pooled  
177 VE estimates ( $I^2=0\%$  to 77%). High heterogeneity ( $I^2=77\%$ ) was observed in the VE estimate  
178 against death within 90-179 days since vaccination for the 80+ cohort, leading to a very wide  
179 95% confidence interval for this estimate. Fixed effects pooled estimates were similar to the  
180 random effect estimates presented in the primary analysis (Supplementary figures – Annex 6).

## 181 **Discussion**

182 Our results indicate that in the population aged 65 years and older, the 2023 autumnal  
183 monovalent XBB.1.5 booster conferred protection against severe COVID-19 outcomes during  
184 the period in which COVID-19 cases were likely to be caused by the Omicron BA.2.86 or JN.1  
185 lineages. These estimates of protection represent a reduction in risk that ranged from 42% to  
186 51% for COVID-19 hospitalisation and from 51 to 59% for COVID-19 deaths for those who  
187 received the vaccine in the last three months, and were consistently lower among those aged  
188  $\geq 80$  years. For those vaccinated, but with more time since vaccination (three or more months)  
189 during the BA.2.86/JN.1 predominance period, XBB.1.5 vaccine presented lower levels of  
190 protection against COVID-19 hospitalisations, ranging from 38% to 47%, and against COVID-19

191 related deaths ranging from 9% to 54% though, as discussed earlier, the latter estimates against  
192 COVID-19-related deaths had low precision.

193 Our results suggest a lower VE among those who received a vaccine between 14 and 89 days in  
194 the BA.2.86/JN.1 predominant period, compared to the XBB predominant period estimates  
195 obtained in the VEBIS-EHR network (4). Specifically, in the 65–79-year-old XBB.1.5 VE against  
196 hospitalisations decreased from 64% (95%CI 55 to 72) in the XBB period to 51% (95%CI 45 to 56)  
197 in the BA 2.86/JN1 period and for those  $\geq 80$  years from 65% (95%CI 56 to 71) to 42% (95%CI 36  
198 to 47). The XBB.1.5 VE against COVID-19-related deaths declined in those aged 65-79 years from  
199 67% (95%CI: 42 to 81) to 59% (95%CI 41 to 72) and in those  $\geq 80$  years from 67% (95%CI: 41 to  
200 81) to 51% (95%CI: 42 to 59). These differences could be due to higher natural immunity in the  
201 comparison group due to recent SARS-CoV-2 infection, although other studies employing  
202 different study designs have also found evidence of reduced vaccine effectiveness against  
203 BA.2.86/JN.1 relative to XBB.1.5 (15).

204 Our results are concordant with results from other studies that estimated COVID-19 VE against  
205 severe outcomes potentially due to XBB sub-lineages or JN.1 SARS-CoV-2 lineages. A test-  
206 negative design study conducted in England (8) in the population aged 65 years or more showed  
207 a decrease in VE against hospitalisations from 74% (95%CI: 62% to 82%) against XBB sub-lineages  
208 to 37% (95%CI: -20 to 66) against JN.1, for those who were vaccinated 2-4 weeks after  
209 vaccination before. Similar results were also observed in two studies conducted in the United  
210 States (5,6) that aimed to estimate XBB.1.5 VE against hospitalisations likely due to XBB sub-  
211 lineages versus JN.1 among individuals aged  $\geq 18$  years. In both studies, a reduction in the  
212 protection of XBB.1.5 vaccine against COVID-19 hospitalisations was observed within the first 60  
213 days after vaccination, respectively from 62% (95%CI: 44% to 74%) to 32% (95%CI: 3% to 52%)  
214 (5), and from 74% (95%CI: 49% to 87%) to 50% (95%CI: 15% to 71%) (6).

215 The results presented here should be interpreted cautiously, considering the potential presence  
216 of confounding bias, given its observational nature, and the possible misclassification of the  
217 vaccine status and outcome once we used an EHR-based multicentre study. The vaccine status  
218 hazard ratios were adjusted for several potential confounding factors at the study site level. Still,  
219 although this adjustment was made, we cannot exclude the presence of confounding residual  
220 bias from our analysis. Considering misclassification of the exposure, vaccination information  
221 was extracted from national vaccination registries and measured prior to, and independently of,  
222 the outcome. Estimates of 2023 autumnal COVID-19 vaccine coverage observed within our EHR-  
223 based study population were very close to the officially reported equivalents produced by the  
224 ECDC (Supplementary, Annex 6, Table S5). We considered our VE estimate representative of  
225 XBB.1.5 vaccine performance given that 98.3% (Table 1) of the vaccines received during the  
226 study period were the monovalent XBB.1.5. Among these, 99% were the Pfizer Comirnaty  
227 XBB.1.5-adapted vaccine, which indicates that our VE estimates represent the effectiveness of  
228 this vaccine brand in general.

229 Additionally, we cannot rule out the presence of misclassification or underreporting of COVID-  
230 19 hospitalisations and deaths, even using national hospitalisations, death and laboratory  
231 registries given the lag between event and full recording of such events in the relevant EHRs,  
232 and also due the reduction in SARS-CoV-2 testing that would underestimate COVID-19 related  
233 deaths identification. To reduce the effect of misclassification bias due to unextracted events,  
234 or otherwise due to extraction of incomplete records, a two-month delay between the end of  
235 the study period (i.e., the last possible event) and extraction of data from source EHRs has been  
236 implemented. For the purpose of this analysis, no EHR extractions were undertaken until at least  
237 April 2024. Nevertheless, we do not expect that misclassification of the outcome could be  
238 differential by the vaccine status. If underreporting of events is present in our data, we do not  
239 expect a bias to arise from it, only a loss in the number of events and statistical power. On the

240 other hand, if non-COVID-19 hospitalisation are classified as COVID-19 event, we expect that our  
241 estimates would be biased to the null effect (16).

242 Another issue to be addressed, will be the high diffusion of self-diagnosis through at-home  
243 testing and the possible under-ascertainment of asymptomatic and mild cases, it is likely that  
244 some SARS-CoV-2 infections were not reported, thus leading to a possible overestimation of the  
245 eligible individuals at the start of the vaccination campaigns. This was likely more frequent in  
246 those who did not receive the seasonal booster, possibly causing an underestimation of VE.

247 The comparison of VE by time since XBB.1.5 administration among different epidemic phases,  
248 like XBB vs BA.2.86 predominance periods, should be interpreted with cautions because of the  
249 possible different unmeasured characteristics among persons who received the seasonal  
250 booster at different times. For example, those who received the booster dose later might be  
251 generally less prone to adopt preventive measures and therefore have had a higher exposure to  
252 risky behaviours than those who received it earlier. Additionally, individuals with a recent  
253 infection will be higher among unvaccinated persons during BA.2.86/JN.1 period. Both these  
254 situations could have resulted in a relative underestimation of VE during the BA.2.86/JN.1  
255 predominance period, and a slight overestimation of VE in the XBB predominance period.

256 Despite the limitations described above, our study also has several strengths. As we employed  
257 mostly national registries, large sample sizes and a large number of events were reported by  
258 study sites, leading to a high precision around VE estimates and allowing stratified VE estimates.  
259 Additionally, the fact that the study was conducted in seven different EU/EEA countries using a  
260 common scientific protocol published ahead of the study development (12), and the low to  
261 moderate heterogeneity observed between study-level VE estimates, reinforce the consistency  
262 and reproducibility of the results in the participating study sites.

263 In conclusion, our XBB.1.5 VE estimates against severe COVID-19, likely caused by BA.2.86/JN.1,  
264 were lower than those observed during the XBB.1.5 lineage predominance period. Nevertheless,

265 the results of our study indicate that the XBB.1.5 vaccine offered moderate protection ( $\geq 40\%$ )  
266 for up to six months after vaccination against severe COVID-19, likely caused by BA.2.86/JN.1,  
267 during the 2023/2024 winter in older ( $\geq 65$  years old) populations.

## 268 **Acknowledgments**

269 The authors would like to thank all the people from the study sites involved in the data collection  
270 and for producing estimates of VE, as without their work these results wouldn't be available for  
271 the scientific community and the public.

272 We gratefully acknowledge all data contributors, i.e., the Authors and their Originating  
273 laboratories responsible for obtaining the specimens, and their Submitting laboratories for  
274 generating the genetic sequence and metadata and sharing via the GISAID Initiative, on which  
275 this research is based.

## 276 **Ethics**

277 All study sites participating in this study conformed with their respective national and EU ethical  
278 and data protection requirements. Ethical statements for each of the participating study sites:

279 **Belgium:** Data linkage and collection within the data-warehouse have been approved by the  
280 information security committee. The study was conducted in accordance with the Declaration  
281 of Helsinki. Ethical approval was granted for the gathering of data from hospitalized patients by  
282 the Committee for Medical Ethics from the Ghent University Hospital (reference number BC-  
283 07507) and authorization for possible individual data linkage using the national register number  
284 from the Information Security Committee (ISC) Social Security and Health (reference number  
285 IVC/KSZG/20/384). Linkage of hospitalized patient data to vaccination and testing within the  
286 LINK-VACC project was approved by the Medical Ethics Committee UZ Brussels–VUB on 3  
287 February 2021 (reference number 2020/523), and authorization from the ISC Social Security and  
288 Health (reference number IVC/KSZG/21/034).

289 **Denmark:** Only administrative register data was used for the study. According to Danish law,  
290 ethics approval is exempt for such research, and the Danish Data Protection Agency, which is  
291 dedicated ethics and legal oversight body, thus waives ethical approval for the study of  
292 administrative register data when no individual contact of participants is necessary, and only  
293 aggregate results are included as findings. The study is, therefore, fully compliant with all legal  
294 and ethical requirements, and there are no further processes available regarding such studies.

295 **Navarre (Spain):** The study was approved by Navarre's Ethical Committee for Clinical Research,  
296 which waived the requirement of obtaining informed consent.

297 **Norway:** Ethical approval was granted by Regional Committees for Medical and Health Research  
298 Ethics (REC) Southeast (reference number 122745). The Norwegian Institute of Public Health has  
299 performed a Data Protection Impact Assessment (DPIA) for Beredt C19.

300 **Portugal:** The study received approval from the Ethical Committee and the Data Protection  
301 Officer of the Instituto Nacional de Saúde Doutor Ricardo Jorge. Given that data was irreversibly  
302 anonymised, the need for the participants' informed consent was waived by the Ethical  
303 Committee.

304 **Italy:** This study, based on routinely collected data, will not be submitted for approval to an  
305 ethical committee because the dissemination of COVID-19 surveillance data was authorized by  
306 the Italian law N. 52 of 19 May 2022, following the law decree N. 24 of 24 March 2022 (Article  
307 n. 13). Based on the same acts, the information on COVID-19 vaccination was retrieved by the  
308 Italian National Institute of Health using data from the National Immunisation Information  
309 System of the Italian Ministry of Health. Because of the retrospective design and the large size  
310 of the population under study, in accordance with the Authorization n. 9 released by the Italian  
311 data protection authority on 15 December 2016, the individual informed consent was not  
312 requested for the conduction of this study.

313 **Sweden:** The Swedish study is approved by the Swedish Ethical Review Authority (2020-06859,  
314 2021-02186) and has conformed to the principles embodied in the Declaration of Helsinki.  
315 Consent to participate is not applicable as this is a register-based study.

### 316 **Funding**

317 All the public health organizations involved received funding from the European Centre for  
318 Disease Prevention and Control (ECDC) implementing Framework Contract ECDC/2021/018  
319 ‘Vaccine effectiveness and impact of COVID-19 vaccines through routinely collected exposure  
320 and outcome using health registries’ (RS/2022/DTS/24104). In Portugal, this work was also  
321 supported by FCT – Fundação para a Ciência e Tecnologia, I.P. by project reference  
322 CEECINST/00049/2021/CP2817/CT0001 and DOI identifier  
323 10.54499/CEECINST/00049/2021/CP2817/CT0001

324 **Data Availability:** Authors cannot share the data used for this study, which should be requested  
325 to the data owner institutions following their respective procedures.

326 **Conflict of interest:** Authors declare no competing interests.

327 **Author contribution:** SB, NN, BN, JH and SM conceived the study and BN, JH, NN and SM  
328 conceived the methods. All authors from Public Health institutions at each study site were  
329 responsible for the data management and analysis at the site level. JH was in charge of pooling  
330 site estimates, with the help of SM. BN drafted the first version of the manuscript, with the help  
331 of JH and SM, AN, and EK. All the authors contributed to the interpretation of the results and  
332 critically reviewed the manuscript. All the authors approved the final version of this manuscript.  
333 All the authors within the VEBIS-EHR working group made a substantial contribution to the  
334 conception or design of the work, critically revised the manuscript, provided their final approval  
335 of the version to be published, and agreed to be accountable for all aspects of the work.

### 336 **References**

337 1. European Centre for Disease Prevention and Control. Interim COVID-19 vaccination  
338 coverage in the EU/EEA during the 2023–24 season campaigns [Internet]. ECDC; 2024  
339 [cited 2024 May 28]. Available from: [https://www.ecdc.europa.eu/en/publications-](https://www.ecdc.europa.eu/en/publications-data/interim-covid-19-vaccination-coverage-eueea-during-2023-24-season-campaigns)  
340 [data/interim-covid-19-vaccination-coverage-eueea-during-2023-24-season-campaigns](https://www.ecdc.europa.eu/en/publications-data/interim-covid-19-vaccination-coverage-eueea-during-2023-24-season-campaigns)

- 341 2. European Centre for Disease Prevention and Control. Communicable disease threats  
342 report, 17-23 December 2023, week 51. ECDC; 2023.
- 343 3. Hansen CH, Moustsen-Helms IR, Rasmussen M, Søbørg B, Ullum H, Valentiner-Branth P.  
344 Short-term effectiveness of the XBB.1.5 updated COVID-19 vaccine against hospitalisation  
345 in Denmark: a national cohort study. *Lancet Infect Dis*. 2024 Feb 1;24(2):e73–4.
- 346 4. Monge S, Humphreys J, Nicolay N, Braeye T, Van Evercooren I, Holm Hansen C, et al.  
347 Effectiveness of XBB.1.5 Monovalent COVID-19 Vaccines During a Period of XBB.1.5  
348 Dominance in EU/EEA Countries, October to November 2023: A VEBIS-EHR Network  
349 Study. *Influenza Other Respir Viruses*. 2024 Apr;18(4):e13292.
- 350 5. Caffrey AR, Appaneal HJ, Lopes VV, Puzniak L, Zasowski EJ, Jodar L, et al. Effectiveness of  
351 BNT162b2 XBB vaccine in the US Veterans Affairs Healthcare System. *medRxiv*. 2024 Jan  
352 1;2024.04.05.24305063.
- 353 6. Tartof SY, Slezak JM, Puzniak L, Frankland TB, Ackerson BK, Jodar L, et al. Effectiveness of  
354 BNT162b2 XBB Vaccine against XBB and JN.1 Sub-lineages. *medRxiv*. 2024 Jan  
355 1;2024.05.04.24306875.
- 356 7. Yang S, Yu Y, Xu Y, Jian F, Song W, Yisimayi A, et al. Fast evolution of SARS-CoV-2 BA.2.86  
357 to JN.1 under heavy immune pressure. *Lancet Infect Dis*. 2024 Feb 1;24(2):e70–2.
- 358 8. Kirsebom FCM, Stowe J, Lopez Bernal J, Allen A, Andrews N. Effectiveness of autumn 2023  
359 COVID-19 vaccination and residual protection of prior doses against hospitalisation in  
360 England, estimated using a test-negative case-control study. *J Infect*. 2024 May  
361 7;89(1):106177.
- 362 9. Sentís A, Kislaya I, Nicolay N, Meijerink H, Starrfelt J, Martínez-Baz I, et al. Estimation of  
363 COVID-19 vaccine effectiveness against hospitalisation in individuals aged  $\geq 65$  years using  
364 electronic health registries; a pilot study in four EU/EEA countries, October 2021 to March  
365 2022. *Euro Surveill Bull Eur Sur Mal Transm Eur Commun Dis Bull*. 2022 Jul;27(30).
- 366 10. Kislaya I, Sentís A, Starrfelt J, Nunes B, Martínez-Baz I, Nielsen KF, et al. Monitoring COVID-  
367 19 vaccine effectiveness against COVID-19 hospitalisation and death using electronic  
368 health registries in  $\geq 65$  years old population in six European countries, October 2021 to  
369 November 2022. *Influenza Other Respir Viruses*. 2023 Nov;17(11):e13195.
- 370 11. Fontán-Vela M, Kissling E, Nicolay N, Braeye T, Van Evercooren I, Holm Hansen C, et al.  
371 Relative vaccine effectiveness against COVID-19 hospitalisation in persons aged  $\geq 65$  years:  
372 results from a VEBIS network, Europe, October 2021 to July 2023. Vol. 29,  
373 *Eurosurveillance*. 2024. p. 2300670.
- 374 12. European Centre for Disease Prevention and Control. Protocol for a COVID-19 vaccine  
375 effectiveness estimation using health data registries, VEBIS multi-country study - Version  
376 2.0 [Internet]. ECDC; 2024 [cited 2024 May 28]. Available from:  
377 [https://www.ecdc.europa.eu/en/publications-data/protocol-covid-19-vaccine-](https://www.ecdc.europa.eu/en/publications-data/protocol-covid-19-vaccine-effectiveness-estimation-using-health-data-registries)  
378 [effectiveness-estimation-using-health-data-registries](https://www.ecdc.europa.eu/en/publications-data/protocol-covid-19-vaccine-effectiveness-estimation-using-health-data-registries)
- 379 13. European Centre for Disease Prevention and Control. European Respiratory Virus  
380 Surveillance Summary (ERVISS) [Internet]. 2024 [cited 2024 Jun 27]. Available from:  
381 <https://erviss.org/>



- 382 14. Higgins JPT, Thompson SG. Quantifying heterogeneity in a meta-analysis. *Stat Med*. 2002  
383 Jun 15;21(11):1539–58.
- 384 15. Moustsen-Helms IR, Bager P, Larsen TG, Møller FT, Vestergaard LS, Rasmussen M, et al.  
385 Relative vaccine protection, disease severity, and symptoms associated with the SARS-  
386 CoV-2 omicron subvariant BA.2.86 and descendant JN.1 in Denmark: a nationwide  
387 observational study. *Lancet Infect Dis* [Internet]. [cited 2024 Jun 20]; Available from:  
388 [https://doi.org/10.1016/S1473-3099\(24\)00220-2](https://doi.org/10.1016/S1473-3099(24)00220-2)
- 389 16. Hansen CH. Bias in vaccine effectiveness studies of clinically severe outcomes that are  
390 measured with low specificity: the example of COVID-19-related hospitalisation. *Euro*  
391 *Surveill Bull Eur Sur Mal Transm Eur Commun Dis Bull*. 2024 Feb;29(7).

392

393 **Table 1.** Descriptive characteristics of the study population (N= 20,441,648) by vaccination  
 394 status and time since vaccination at the end of the study period\*, within the seven study sites  
 395 (Belgium, Denmark, Italy, Navarre-Spain, Norway, Portugal, and Sweden during BA.2.86/JN.1  
 396 predominant period (from 4 December 2023 until 25 February 2024): VEBIS-EHR network.

| Variable                              | Not vaccinated<br>n (%) | Vaccinated ≥14<br>days<br>n (%) | Vaccinated 14-89<br>days<br>n (%) | Vaccinated 90-179<br>days<br>n (%) |
|---------------------------------------|-------------------------|---------------------------------|-----------------------------------|------------------------------------|
| Total (row % over total = 20,440,689) | 13,907,924 (68)         | 6,533,724 (32.0)                | 2,604,152 (21.7)                  | 3,929,572 (25.2)                   |
| Study site                            |                         |                                 |                                   |                                    |
| Belgium                               | 936,583 (6.7)           | 1,065,561 (16.3)                | 75,731 (2.9)                      | 989,830 (25.2)                     |
| Denmark                               | 219,481 (1.6)           | 894,411 (13.7)                  | 100,989 (3.9)                     | 793,422 (20.2)                     |
| Italy                                 | 10,750,561 (77.3)       | 1,296,464 (19.8)                | 984,379 (37.8)                    | 312,085 (7.9)                      |
| Navarre                               | 45,563 (0.3)            | 154,610 (2.4)                   | 80,262 (3.1)                      | 74,348 (1.9)                       |
| Norway                                | 397,240 (2.9)           | 525,048 (8.0)                   | 160,684 (6.2)                     | 364,364 (9.3)                      |
| Portugal                              | 1,100,849 (7.9)         | 1,251,091 (19.2)                | 325,366 (12.5)                    | 925,725 (23.6)                     |
| Sweden                                | 457,647 (3.3)           | 1,346,539 (20.6)                | 876,741 (33.7)                    | 469,798 (12.0)                     |
| Age group (years)                     |                         |                                 |                                   |                                    |
| 65-79                                 | 9,849,304 (70.8)        | 4,560,138 (69.8)                | 1,796,923 (69.0)                  | 2,763,215 (70.3)                   |
| ≥80                                   | 4,058,620 (29.2)        | 1,973,586 (30.2)                | 807,229 (31.0)                    | 1,166,357 (29.7)                   |
| Sex                                   |                         |                                 |                                   |                                    |
| Male                                  | 7,760,080 (55.8)        | 3,428,717 (52.5)                | 1,344,981 (51.6)                  | 2,083,736 (53.0)                   |
| Female                                | 6,147,822 (44.2)        | 3,105,006 (47.5)                | 1,259,171 (48.4)                  | 1,845,835 (47.0)                   |
| Missing                               | 22 (0.0)                | 1 (0.0)                         | 0 (0.0)                           | 1 (0.0)                            |
| Comorbidities**                       |                         |                                 |                                   |                                    |
| High risk comorbidities               | 355,038 (2.6)           | 478,559 (7.3)                   | 123,707 (4.8)                     | 354,852 (9.0)                      |
| Medium/low risk comorbidities         | 4,947,387 (35.6)        | 3,256,826 (49.8)                | 1,201,668 (46.1)                  | 2,055,158 (52.3)                   |
| No comorbidities                      | 8,579,525 (61.7)        | 2,783,512 (42.6)                | 1,276,771 (49.0)                  | 1,506,741 (38.3)                   |
| Missing                               | 25,974 (0.2)            | 14,827 (0.2)                    | 2,006 (0.1)                       | 12,821 (0.3)                       |
| Number of previous booster doses      |                         |                                 |                                   |                                    |
| 0                                     | 1,598,896 (11.5)        | 31,608 (0.5)                    | 16,461 (0.6)                      | 15,147 (0.4)                       |
| 1                                     | 7,711,858 (55.4)        | 467,250 (7.2)                   | 259,506 (10.0)                    | 207,744 (5.3)                      |
| 2                                     | 4,033,888 (29.0)        | 4,229,639 (64.7)                | 1,443,946 (55.5)                  | 2,785,693 (70.9)                   |
| 3                                     | 546,308 (3.9)           | 1,507,255 (23.1)                | 721,889 (27.7)                    | 785,366 (20.0)                     |
| 4                                     | 16,925 (0.1)            | 296,458 (4.5)                   | 161,663 (6.2)                     | 134,795 (3.4)                      |
| 5                                     | 44 (0.0)                | 1,514 (0.0)                     | 687 (0.0)                         | 827 (0.0)                          |
| Missing                               | 5 (0.0)                 | 0 (0.0)                         | 0 (0.0)                           | 0 (0.0)                            |
| Vaccine product                       |                         |                                 |                                   |                                    |
| Pfizer (monovalent)                   |                         | 75,915 (1.2)                    | 13,953 (0.5)                      | 61,962 (1.6)                       |
| Moderna (monovalent)                  |                         | 139 (0.0)                       | 79 (0.0)                          | 60 (0.0)                           |
| Pfizer (bivalent original/BA.1)       |                         | 4,691 (0.1)                     | 676 (0.0)                         | 4,015 (0.1)                        |
| Moderna (bivalent original/BA.1)      |                         | 11 (0.0)                        | 1 (0.0)                           | 10 (0.0)                           |
| Pfizer (bivalent original/BA.4/BA.5)  |                         | 24,963 (0.4)                    | 2,561 (0.1)                       | 22,402 (0.6)                       |
| Moderna (bivalent original/BA.4/BA.5) |                         | 98 (0.0)                        | 5 (0.0)                           | 93 (0.0)                           |
| <b>Pfizer (XBB.1.5)</b>               |                         | <b>6,373,342 (97.5)</b>         | <b>2,581,821 (98.8)</b>           | <b>3,791,521 (96.5)</b>            |
| <b>Moderna (XBB.1.5)</b>              |                         | <b>49,597 (0.8)</b>             | <b>99 (0.0)</b>                   | <b>49,498 (1.4)</b>                |
| Novavax                               |                         | 4,950 (0.1)                     | 4,950 (0.3)                       | 0 (0.0)                            |
| Other (AZ, others...)                 |                         | 3 (0.0)                         | 2 (0.0)                           | 1 (0.0)                            |
| Missing                               |                         | 15 (0.0)                        | 5 (0.0)                           | 10 (0.0)                           |

\* Vaccination status and time since vaccination were assessed at the end of the individual observation period

---

\*\* High risk comorbidities: immunocompromised conditions with COVID-19 vaccine recommendation; Medium/low risk: non-immunocompromised conditions with COVID-19 vaccine recommendation; No comorbidities: persons without any of the risk comorbidities. (Details are presented in Supplementary material, Annex 3, Table S3)

---

398 **Table 2.** Number of events (COVID-19 hospitalisations or COVID-19 related deaths), person months at risk  
 399 by vaccine status, and vaccine effectiveness overall and by time since vaccination for individuals aged 65-  
 400 79 and ≥80 years old, within the seven study sites (Belgium, Denmark, Italy, Navarre-Spain, Norway,  
 401 Portugal, and Sweden), during BA.2.86/JN.1 predominance period up to 25 February 2024, VEBIS-EHR  
 402 network

|                               | Events | Person-month | VE (95%CI)          | Heterogeneity<br>I <sup>2</sup> (min-max study level VE<br>estimates) |
|-------------------------------|--------|--------------|---------------------|-----------------------------------------------------------------------|
| <b>Age group 65-79</b>        |        |              |                     |                                                                       |
| <b>Hospitalisations</b>       |        |              |                     |                                                                       |
| Not yet vaccinated            | 1765   | 17,778,199   | ref                 | ref                                                                   |
| Overall vaccinated (≥14 days) | 908    | 9,962,714    | 50.2% (44.6; 55.2)  | 0% (45.3%, NV to 60%, BE)                                             |
| Vaccinated (14-89 days)       | 813    | 6,476,931    | 50.9% (45.1; 56.1)  | 0% (48%, NO to 62%, BE)                                               |
| Vaccinated (90-179 days)      | 91     | 2,801,147    | 47.3% (32; 59.1)    | 0% (-30.1%, NV to 67%, SE)                                            |
| <b>Deaths</b>                 |        |              |                     |                                                                       |
| Not yet vaccinated            | 256    | 15,892,126   | ref                 | ref                                                                   |
| Overall vaccinated (≥14 days) | 151    | 7,827,952    | 57.5% (41.5; 69.1)  | 23.2% (17%, SE to 68.1%, DK)                                          |
| Vaccinated (14-89 days)       | 130    | 4,557,449    | 59.2% (41.3; 71.7)  | 32.9% (25%, SE to 68%, PT)                                            |
| Vaccinated (90-179 days)      | 7      | 778,475      | 54.0% (-16.8; 81.9) | 0% (54%, PT to 54%, PT)                                               |
| <b>Age group ≥80 years</b>    |        |              |                     |                                                                       |
| <b>Hospitalisations</b>       |        |              |                     |                                                                       |
| Not yet vaccinated            | 2130   | 7,011,410    | ref                 | ref                                                                   |
| Overall vaccinated (≥14 days) | 1306   | 4,111,559    | 40.7% (35; 45.8)    | 0% (29%, BE to 48%, DK)                                               |
| Vaccinated (14-89 days)       | 1167   | 2,664,791    | 42.0% (36.3; 47.1)  | 0% (25%, BE to 48.2%, NV)                                             |
| Vaccinated (90-179 days)      | 139    | 1,447,525    | 35.9% (11.2; 53.7)  | 38.6% (-1%, IT to 68.5%, DK)                                          |
| <b>Deaths</b>                 |        |              |                     |                                                                       |
| Not yet vaccinated            | 570    | 6,576,524    | ref                 | ref                                                                   |
| Overall vaccinated (≥14 days) | 389    | 3,435,771    | 48.4% (38.4; 56.8)  | 10.1% (36%, NO to 70%, SE)                                            |
| Vaccinated (14-89 days)       | 330    | 2,407,183    | 51.2% (41.9; 59)    | 0% (43%, NO to 71%, SE)                                               |
| Vaccinated (90-179 days)      | 55     | 856,482      | 9.4% (-85.5; 55.8)  | 77.2% (-159%, IT to 51%, PT)                                          |

VE: vaccine effectiveness, CI: Confidence Interval, BE: Belgium, DK: Denmark, IT: Italy; NO: Norway, NV: Navarre, PT: Portugal, SE: Sweden

VE = one minus the pooled confounder-adjusted hazard ratio at study level using a Cox regression time dependent model (confounder variables used in each study site are available in Annex 3 and 4 of the Supplementary material).

403
